# Supplementary material
Source: PubMed Central journal article supplement (PMC1482593)

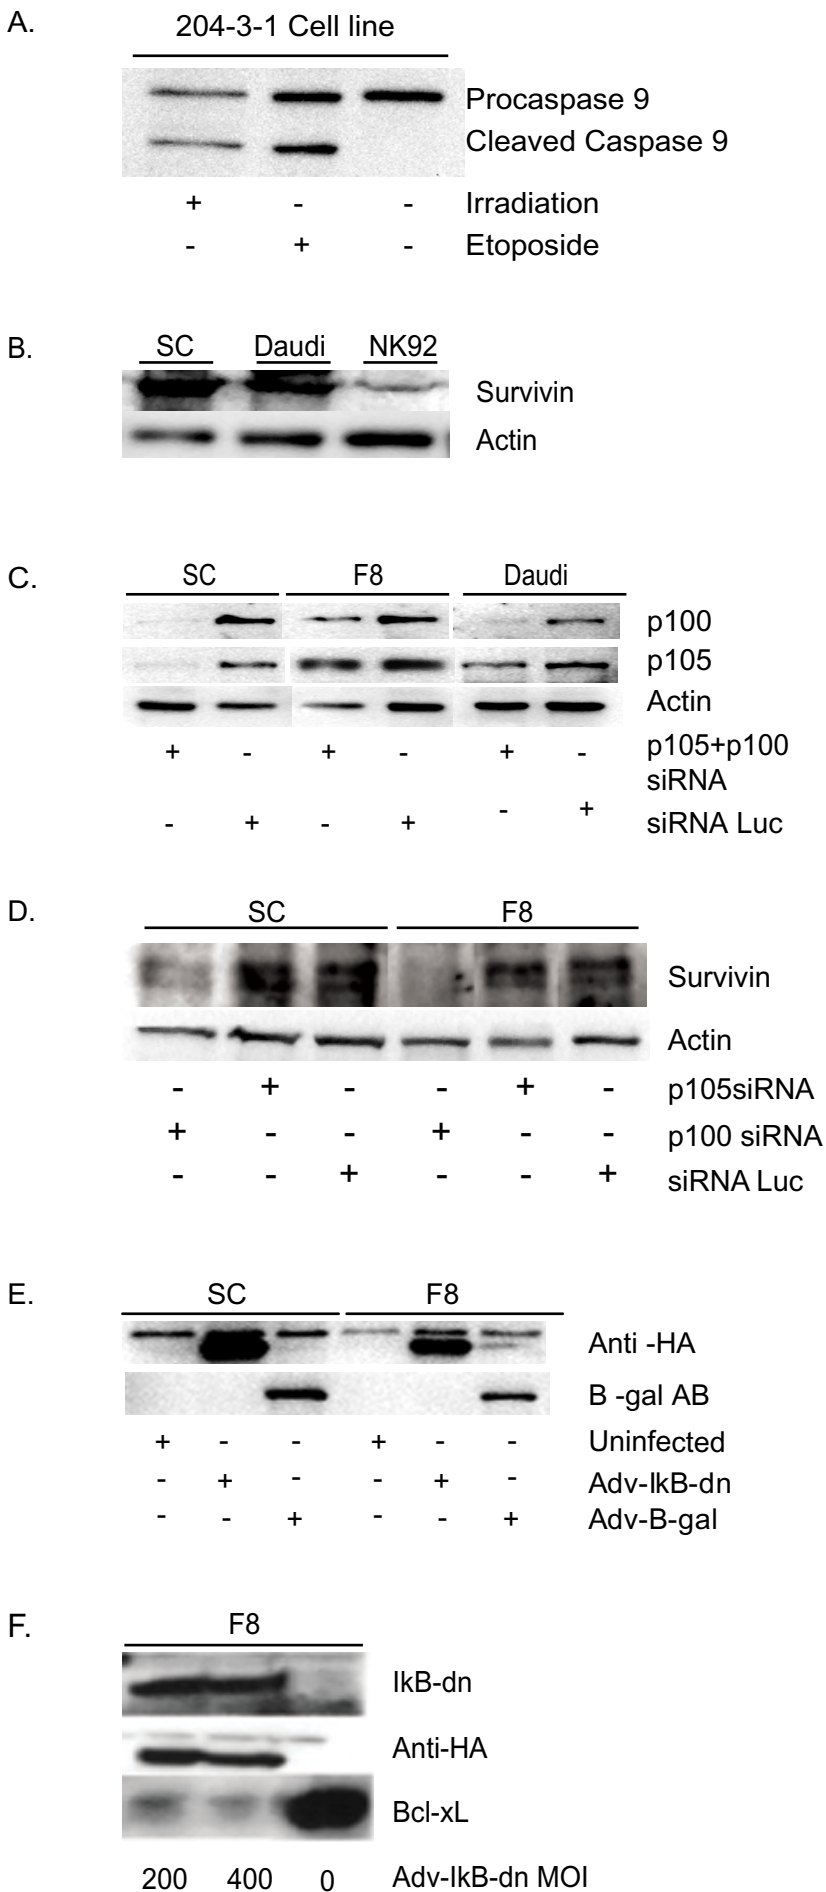

Supplement: pnas_0507809103_1.pdf [file pnas_0507809103_1.pdf]

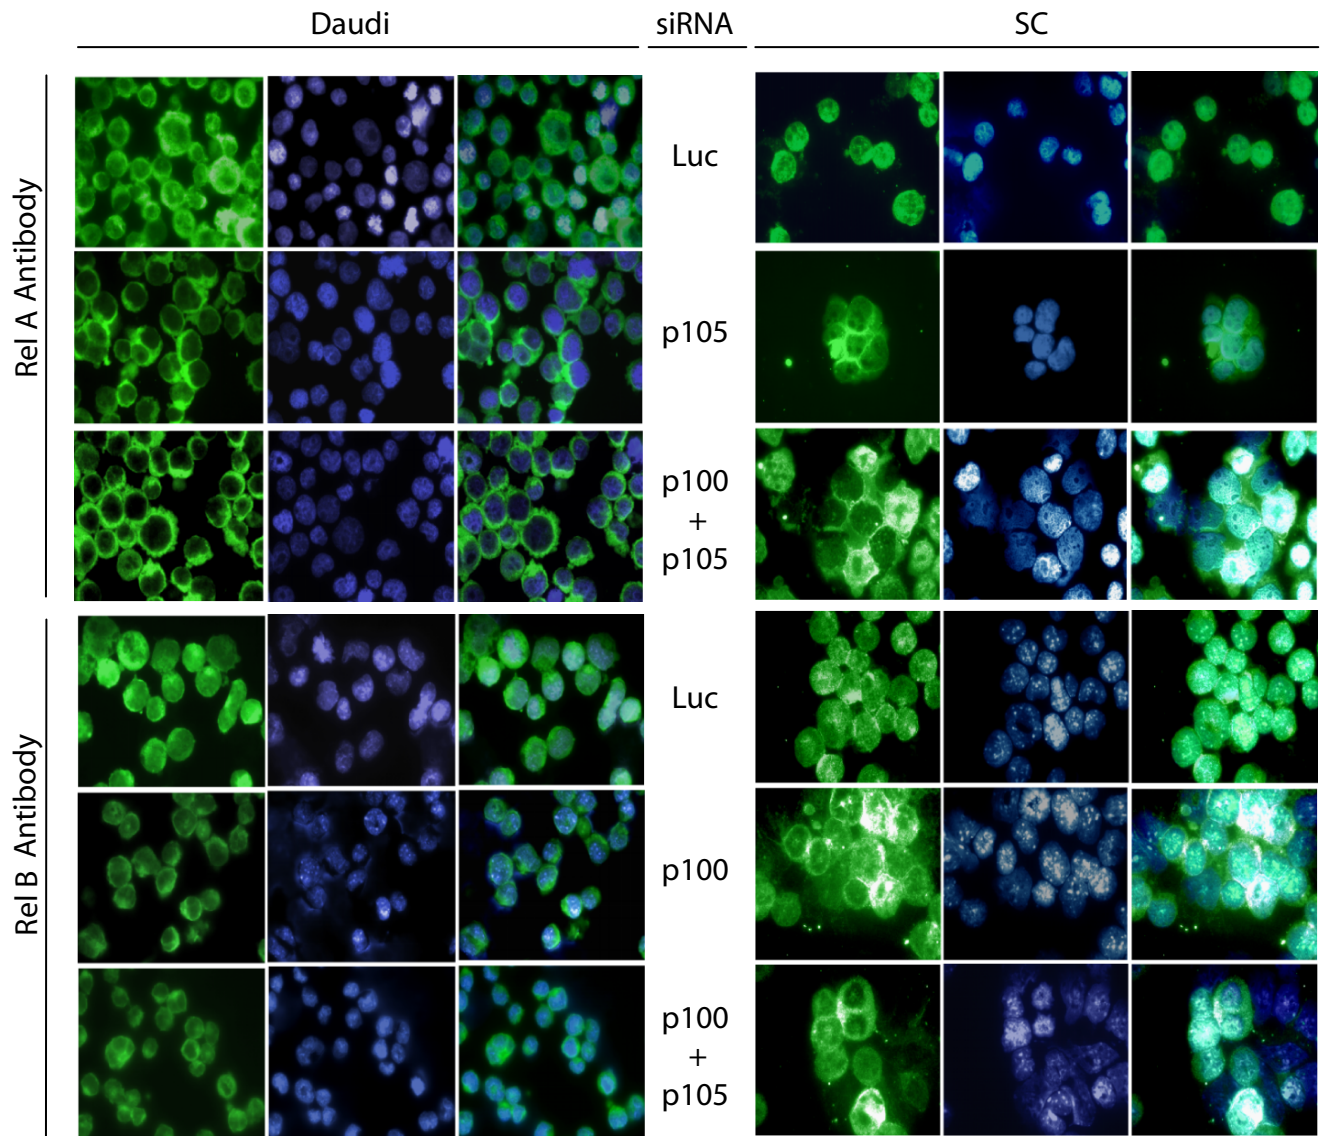

Supplement: pnas_0507809103_2.pdf [file pnas_0507809103_2.pdf]

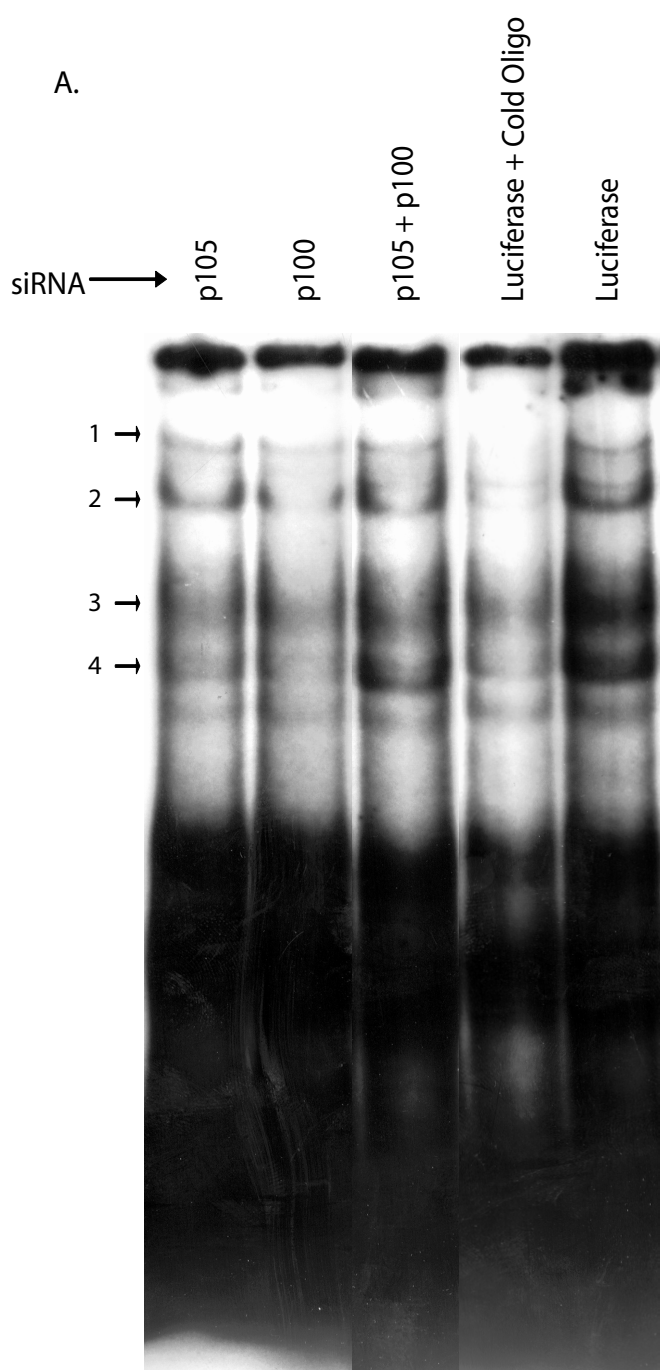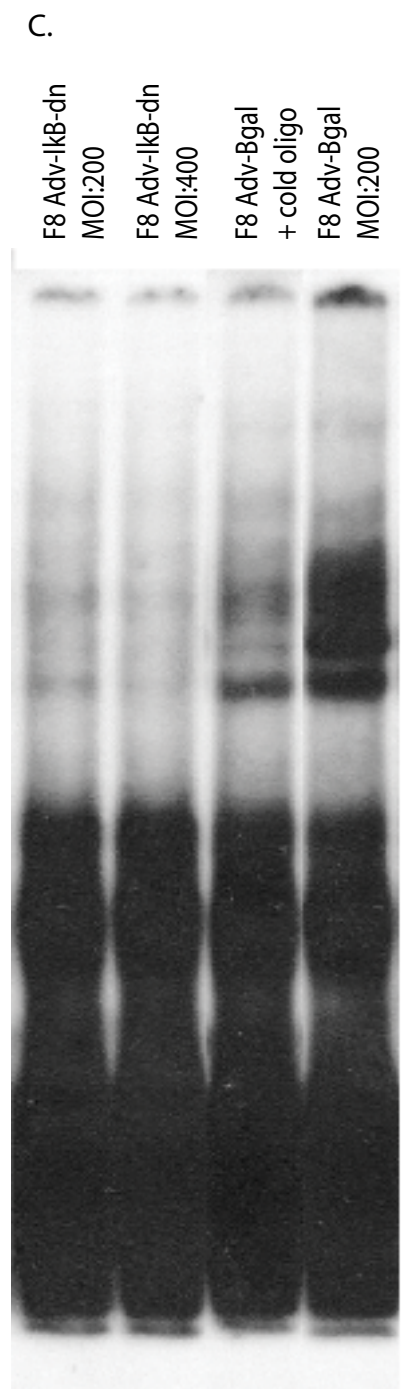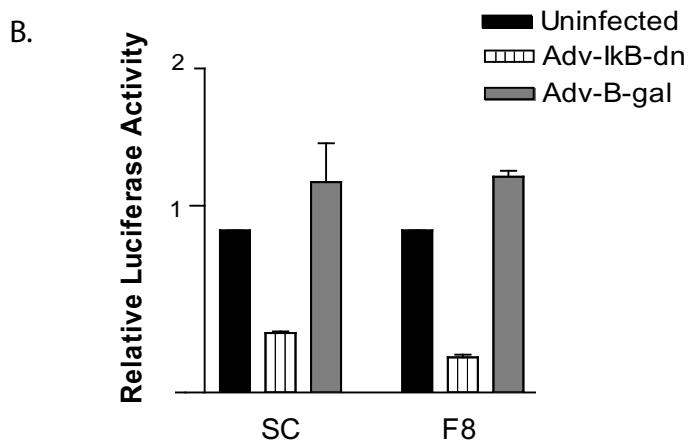

Supplement: pnas_0507809103_3.pdf [file pnas_0507809103_3.pdf]
